# Supplementary material
Source: PubMed Central journal article supplement (PMC3782081)
Supplement: NIHMS407708-supplement-1.pdf [file NIHMS407708-supplement-1.pdf]

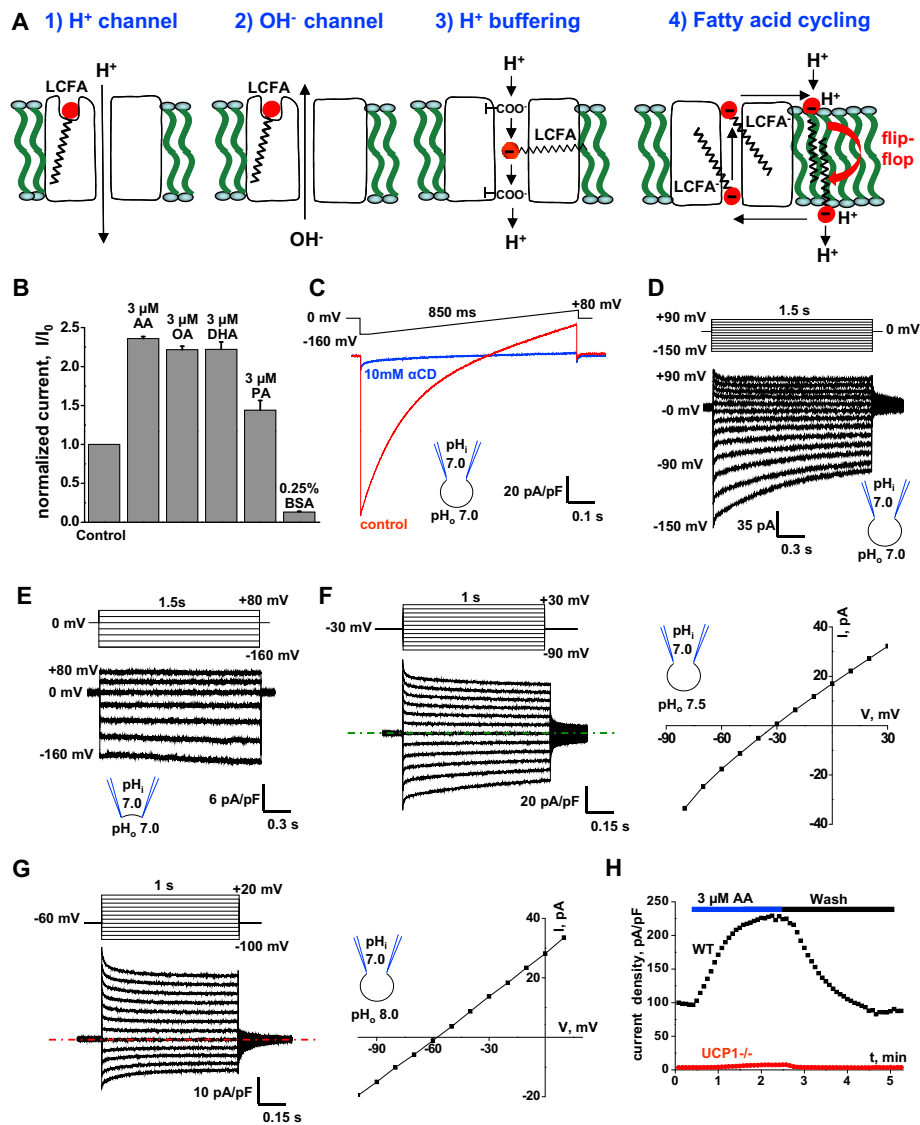

**Figure S1. Electrophysiological Properties of UCP1 Current, Related to Figure 1**

(A) Proposed models of UCP1 operation (from left to right): (1)  $H^+$  channel activated by allosteric binding of LCFAs; (2)  $OH^-$  channel activated by allosteric binding of LCFAs; (3) the  $H^+$  buffering model; (4) the fatty-acid cycling model.

(B) Mean normalized amplitudes of the whole-mitoplast putative UCP1 current measured before (control) and after addition of 3  $\mu M$  arachidonic acid (AA), oleic acid (OA), docosahexaenoic acid (DHA), palmitoleic acid (PA), or 0.25% BSA to the bath solution;  $n = 4-18$ . Current amplitudes were measured upon stepping from 0 to  $-160$  mV (see voltage protocol in Figure 1C) and normalized to the control value. The leak current was not subtracted.

(C) The whole-mitoplast putative UCP1 current (control, red) is inhibited by 10 mM  $\alpha CD$  (blue). The voltage protocol is indicated at the top. The pipette-mitoplast diagram indicates the recording conditions.

(D) The whole-mitoplast  $I_{UCP1}$  in response to voltage steps from a holding potential of 0 mV;  $\Delta V = 20$  mV.

(E) Inside-out  $I_{UCP1}$  in response to voltage steps from a holding potential of 0 mV,  $\Delta V = 40$  mV. The BSA-insensitive leak current was subtracted.

(F) Left panel: Whole-mitoplast  $I_{UCP1}$  recorded at  $\Delta pH = 0.5$  in response to the voltage step protocol indicated at the top of the panel;  $\Delta V = 10$  mV. A holding potential of  $-30$  mV (close to the  $E_H$ ) was selected to minimize  $I_{UCP1}$  between applications of voltage steps and to eliminate depletion of the proton buffer inside the mitoplast (see Experimental Procedures). A zero current level is indicated by the green dotted line. Right panel: The I/V curve corresponding to the current traces in the left panel. Note the reversal potential. The pH values in the pipette and bath solutions are as indicated on the diagram.

(G) Left panel: Whole-mitoplast  $I_{UCP1}$  recorded at  $\Delta pH = 1$  in response to the voltage step protocol indicated at the top of the panel;  $\Delta V = 20$  mV. A holding potential of  $-60$  mV (close to  $E_H$ ) was selected to minimize depletion of proton buffer inside the mitoplast between voltage steps. A zero current level is indicated by the red dotted line. Right panel: The I/V curve corresponding to the current traces in the left panel. Note the reversal potential. The pH values in the pipette and bath solutions are as indicated on the diagram.

(H) Representative time-course activation of the whole-mitoplast current by 3  $\mu M$  AA in wild-type (WT, black) and UCP1<sup>-/-</sup> (red) mice. Current amplitudes were measured upon stepping from 0 to  $-160$  mV as in Figure 1C.

Error bars represent SEM.

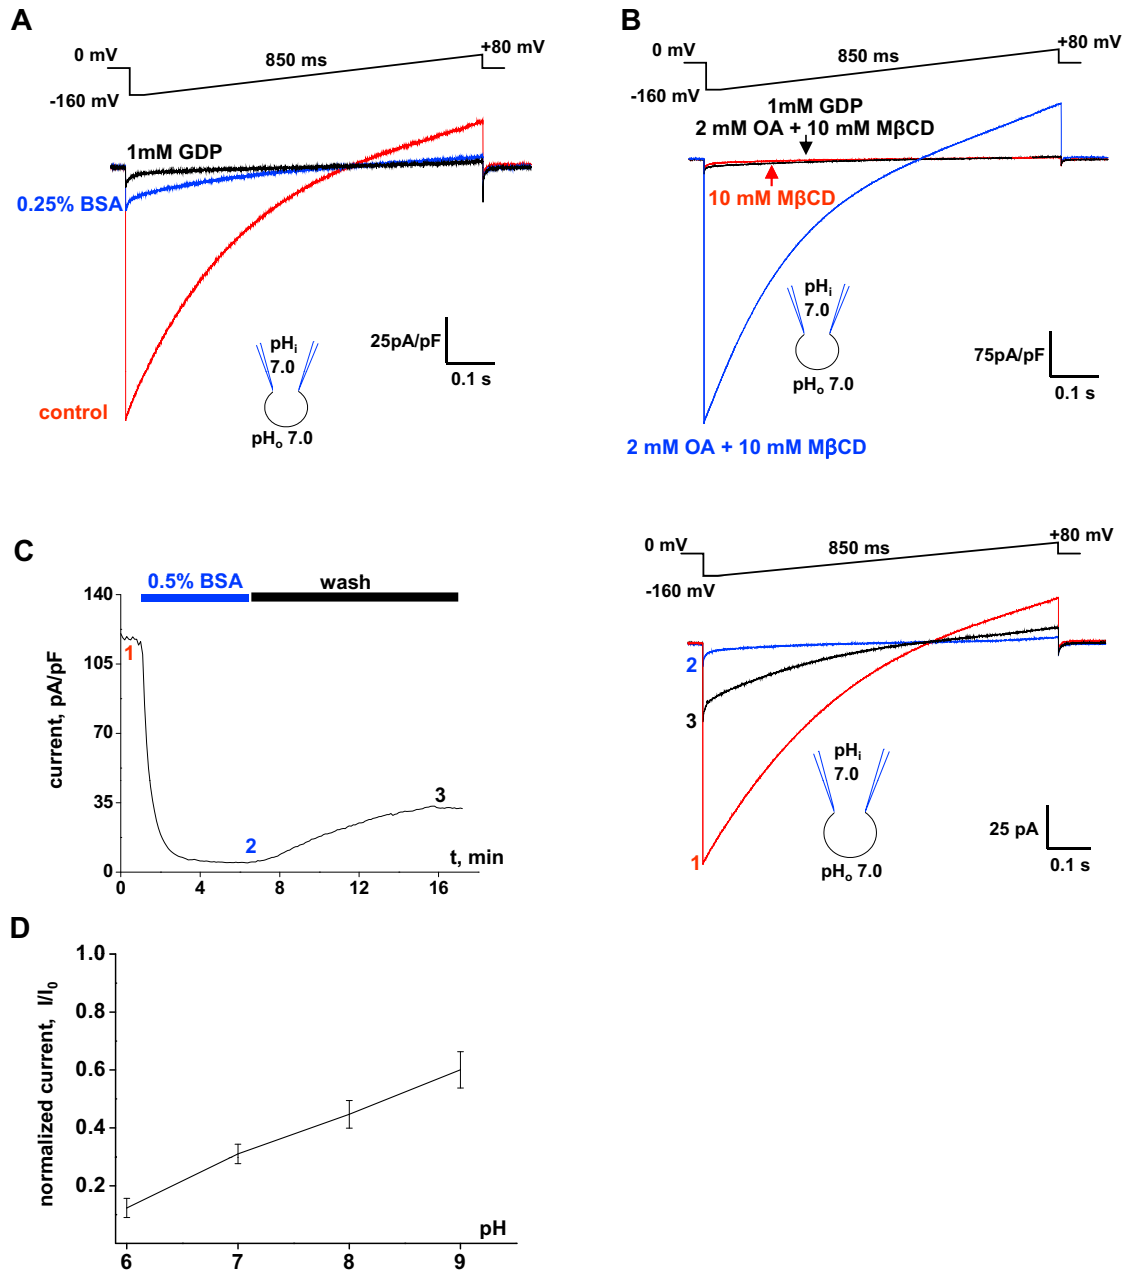

**Figure S2. UCP1 Is Activated by LCFAs, Related to Figure 2**

(A) Representative  $I_{UCP1}$  in control (red), upon extraction of endogenous LCFAs with 0.25% BSA (blue), and in 1 mM GDP (black).

(B) Representative  $I_{UCP1}$  upon extraction of endogenous LCFAs with 10 mM M $\beta$ CD (red), after application of 2 mM OA mixed with 10 mM M $\beta$ CD (blue), and upon application of 2 mM OA/10 mM M $\beta$ CD with 1 mM GDP (black).

(C) Left panel: Representative time course of  $I_{UCP1}$  amplitude in control (1) and after the application (2) and subsequent washout (3) of 0.5% BSA at pH 7.0.  $I_{UCP1}$  amplitudes were measured upon stepping from 0 to -160 mV (see right panel). Right panel:  $I_{UCP1}$  traces recorded at times 1, 2, and 3 as indicated in the left panel.

(D) Graph showing the fraction of  $I_{UCP1}$  recovered after deactivation with 10 mM  $\alpha$ CD at different symmetrical pH values.

Error bars represent SEM.

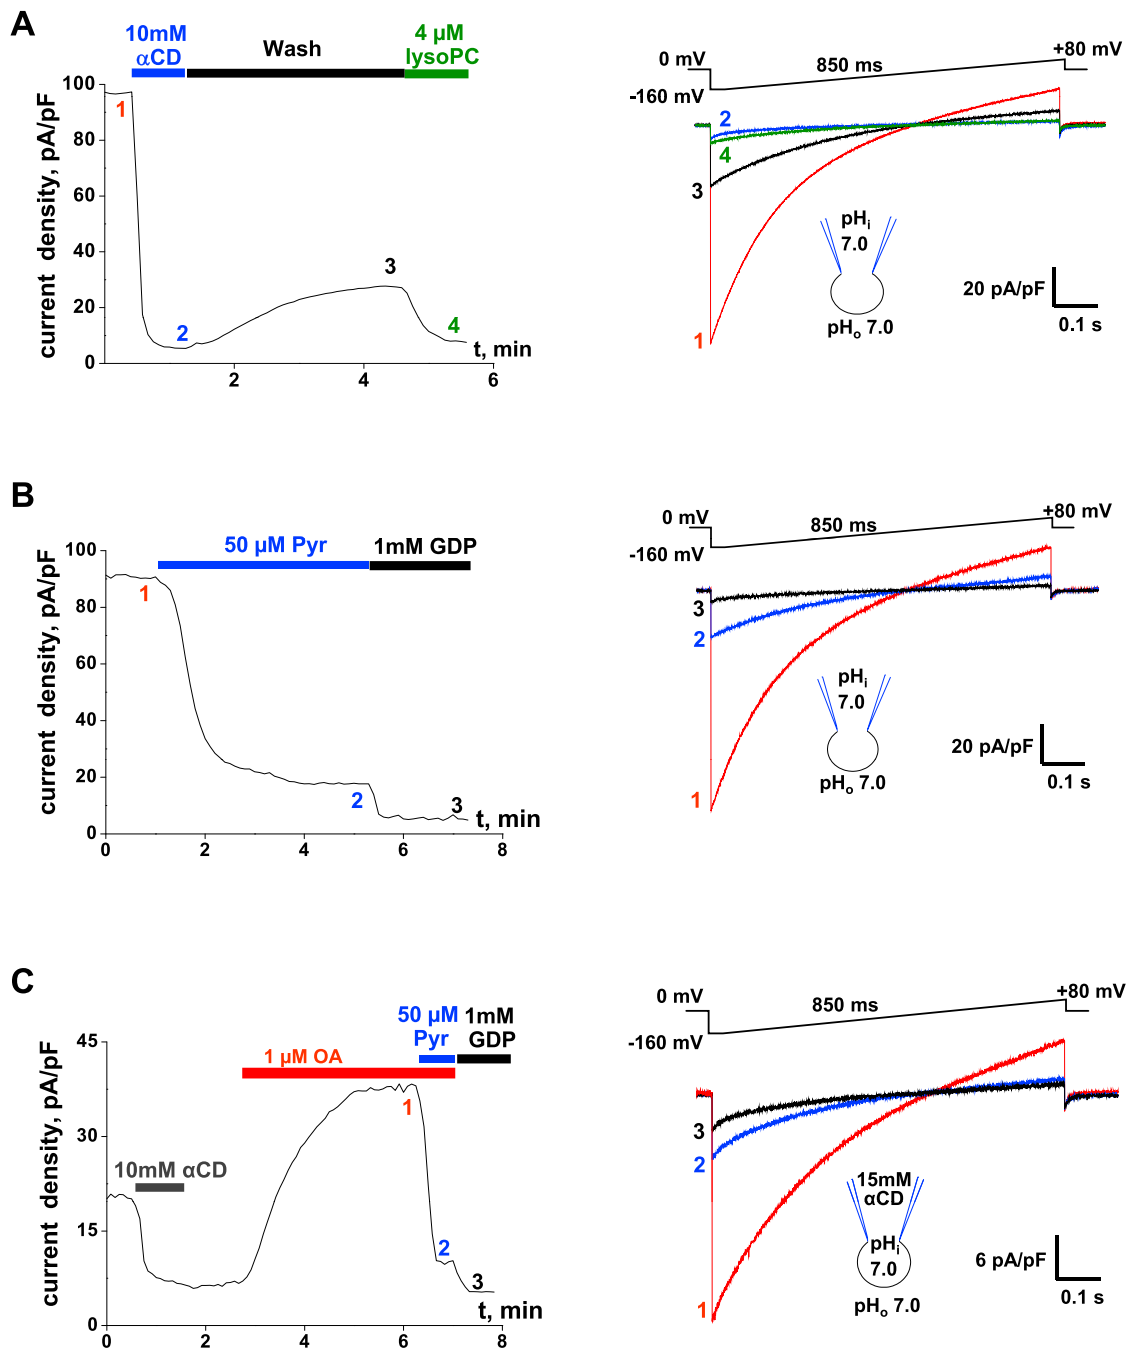

**Figure S3. Regulation of  $I_{UCP1}$  by PLA2 Inhibitors, Related to Figure 3**

(A) Left panel: Representative time course of the  $I_{UCP1}$  amplitude in control (1), after the extraction of endogenous LCFAs with 10 mM  $\alpha$ CD (2), after the reactivation of  $I_{UCP1}$  by endogenous membrane LCFAs upon washout of  $\alpha$ CD (3), and upon subsequent application of 4  $\mu$ M oleoyl-lysoPC (4).  $I_{UCP1}$  amplitudes were measured upon stepping from 0 to  $-160$  mV (see right panel). Right panel:  $I_{UCP1}$  traces recorded at times 1, 2, 3, and 4 as indicated in the left panel.

(B) Left panel: Representative time course of  $I_{UCP1}$  amplitude in control (1), upon the application of 50  $\mu$ M pyrrophenone (Pyr, 2), and with the subsequent application 1 mM GDP (3).  $I_{UCP1}$  amplitudes were measured upon stepping from 0 to  $-160$  mV (see right panel). Right panel:  $I_{UCP1}$  traces recorded at times 1, 2, and 3 as indicated in the left panel.

(C) Left panel: Representative time course of the  $I_{UCP1}$  amplitude after the extraction of endogenous LCFAs with 10 mM  $\alpha$ CD, the reactivation of  $I_{UCP1}$  with 1  $\mu$ M of OA (1), the subsequent addition of 50  $\mu$ M pyrrophenone (2), and the application of 1 mM GDP (3). The pipette solution contained 15 mM  $\alpha$ CD to extract endogenous LCFAs.  $I_{UCP1}$  amplitudes were measured upon stepping from 0 to  $-160$  mV (see right panel). Right panel:  $I_{UCP1}$  traces recorded at times 1, 2, and 3 as indicated in the left panel.

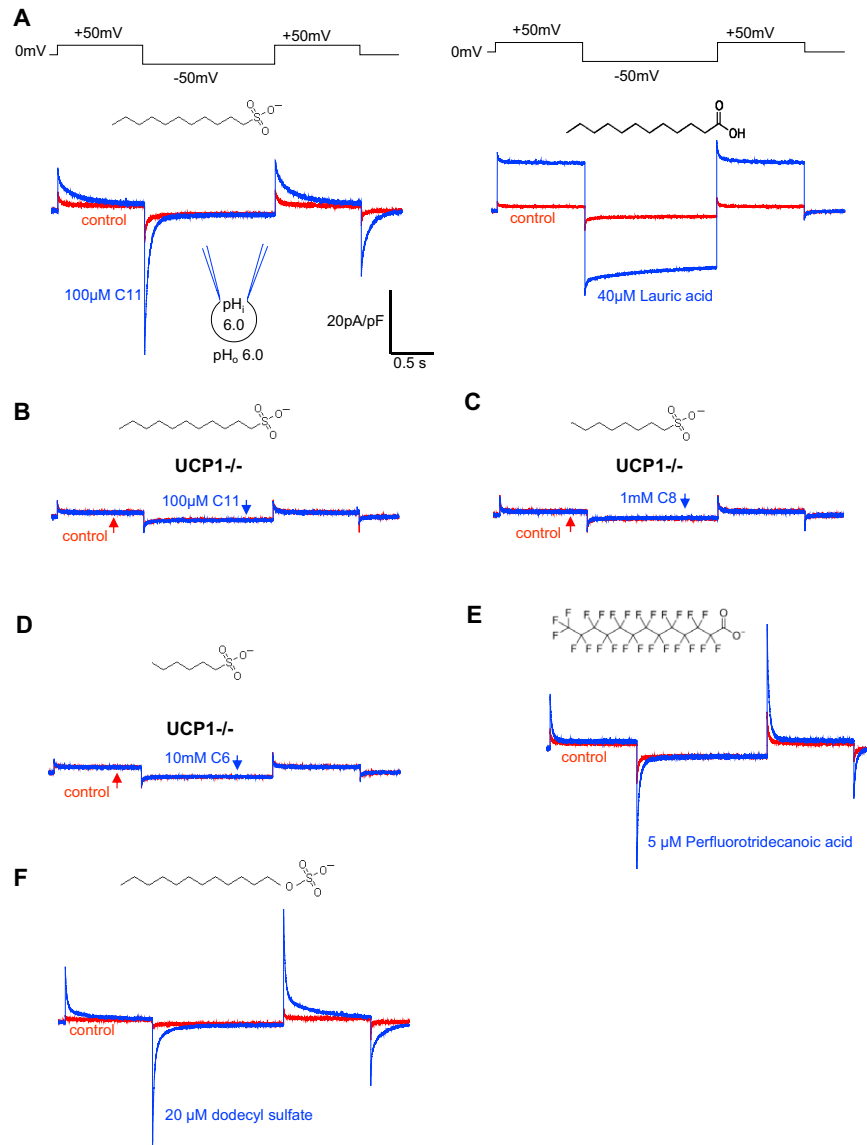

**Figure S4. Currents Caused by Low-pKa LCFA Analogs in Wild-Type and  $UCP1^{-/-}$  Mitoplasts, Related to Figure 4**

(A) Left panel: Representative whole-mitoplast  $I_{UCP1}$  recorded upon extraction of endogenous membrane LCFAs with  $\alpha$ CD (control, red) and after subsequent activation with 100  $\mu$ M C11-sulfonate (blue). The experiment was performed at symmetrical pH 6.0. These traces are also shown in Figure 4B, left panel. Voltage protocol and structure of C11-sulfonate are shown at the top of the panel. The pipette-mitoplast diagram indicates the recording conditions. Right panel:  $I_{UCP1}$  activated by 40  $\mu$ M lauric acid (C11-carboxylate) under the same recording conditions as in the left panel.

(B–D) Currents induced by 100  $\mu$ M C11-sulfonate, 1 mM C8-sulfonate, and 10 mM C6-sulfonate, respectively, in  $UCP1^{-/-}$  mitoplasts. See (A) for recording conditions and calibration bars.

(E and F)  $I_{UCP1}$  induced by 5  $\mu$ M perfluorotridecanoic acid and 20  $\mu$ M dodecyl sulfate, respectively, in wild-type mitoplasts. See (A) for recording conditions and calibration bars.

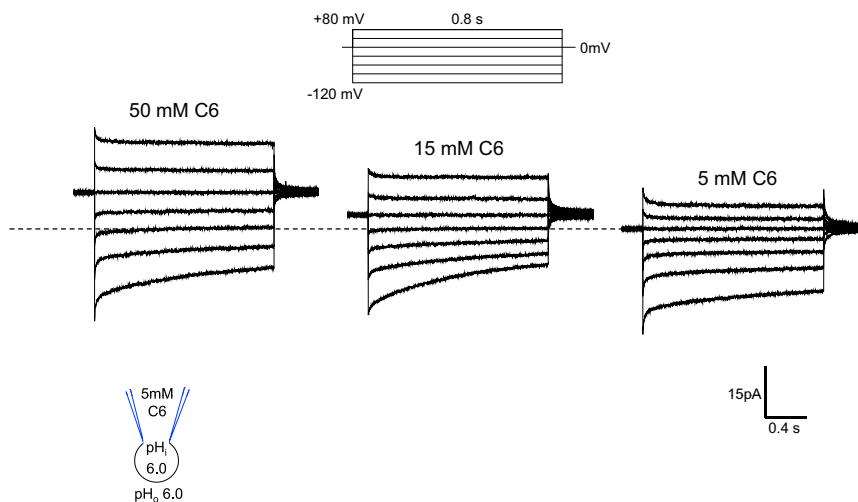

**Figure S5.  $I_{UCP1}$  at Different Transmembrane Gradients of C6-Sulfonate, Related to Figure 5**

$I_{UCP1}$  carried by C6-sulfonate at pH 6.0 in the presence of 5 mM C6-sulfonate in the pipette and varying concentrations of C6-sulfonate (50 mM, 15 mM, and 5 mM) in the bath solution. The voltage protocol is shown at the top, and the pipette-mitoplast diagram indicates the recording conditions. The zero current level is indicated by the dotted line.

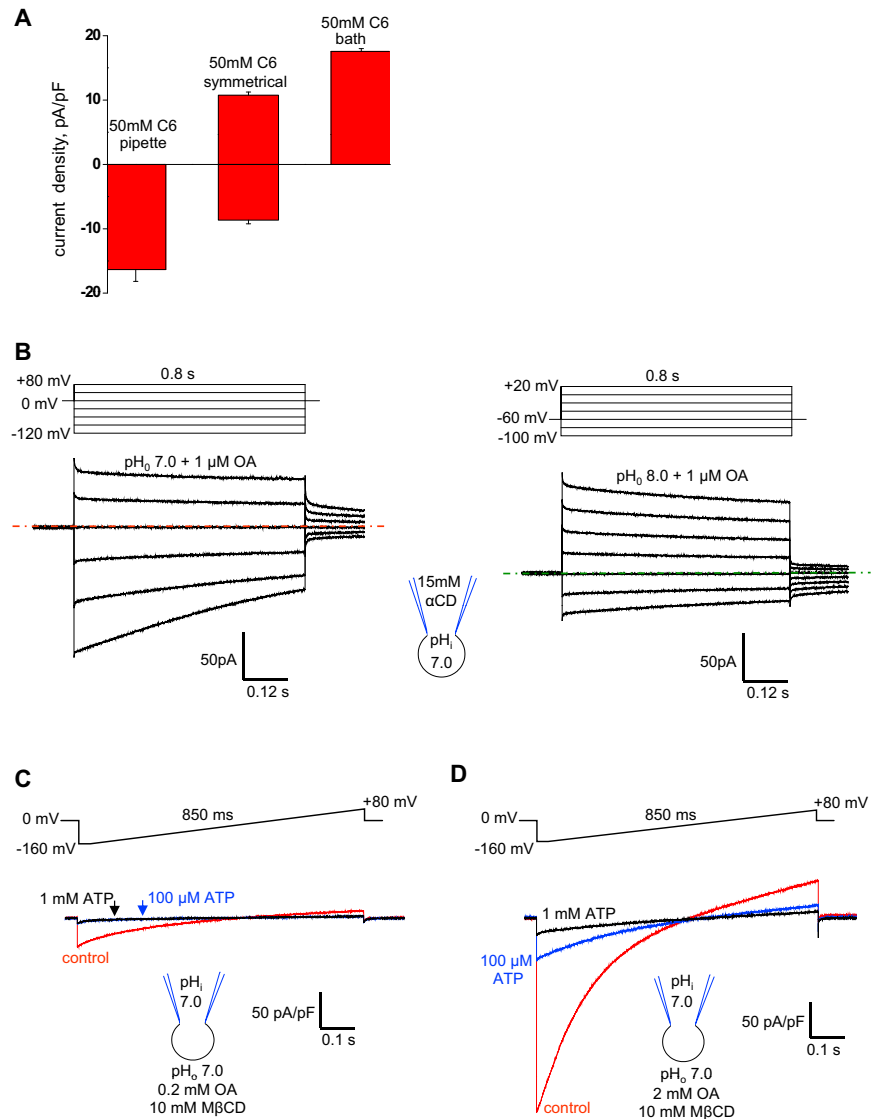

**Figure S6. Asymmetry of Substrate Binding to UCP1, Related to Figure 6**

(A) The mean amplitude of  $I_{UCP1}$  carried by C6-sulfonate, recorded with either 50 mM C6-sulfonate in the pipette, 50 mM C6-sulfonate in the bath, or symmetrical 50 mM C6-sulfonate,  $n = 4$ .  $I_{UCP1}$  was measured in the beginning of the second ( $-50$  mV, inward  $I_{UCP1}$ ) and third ( $+50$  mV, outward  $I_{UCP1}$ ) voltage steps; see Figure 6D.

(B) Left panel: Representative  $I_{UCP1}$  recorded with 15 mM  $\alpha$ CD in the pipette solution and 1  $\mu$ M OA in the bath solution. Both bath and pipette solutions had pH values of 7.0. The voltage step protocol is indicated at the top of the panel;  $\Delta V = 40$  mV. Right panel:  $I_{UCP1}$  recorded from the same mitoplast after the pH in the bath solution was changed to 8.0. The holding potential was changed to  $-60$  mV to eliminate depletion of the proton buffer inside the mitoplast between voltage steps. The zero current level is indicated by the dotted lines. The pipette-mitoplast diagram indicates the recording conditions. The  $I_{UCP1}$  amplitude measured at the beginning of the voltage steps was used to plot the UCP1 I/V curves in Figure 6E.

(C) Representative  $I_{UCP1}$  induced by 0.2 mM OA mixed with 10 mM M $\beta$ CD in control (red), and in the presence of 100  $\mu$ M (blue) and 1 mM (black) ATP. Note that the blue and the black traces coincide.

(D) Representative  $I_{UCP1}$  induced by 2 mM OA mixed with 10 mM M $\beta$ CD in control (red), and in the presence of 100  $\mu$ M (blue) and 1 mM (black) ATP. Error bars represent SEM.

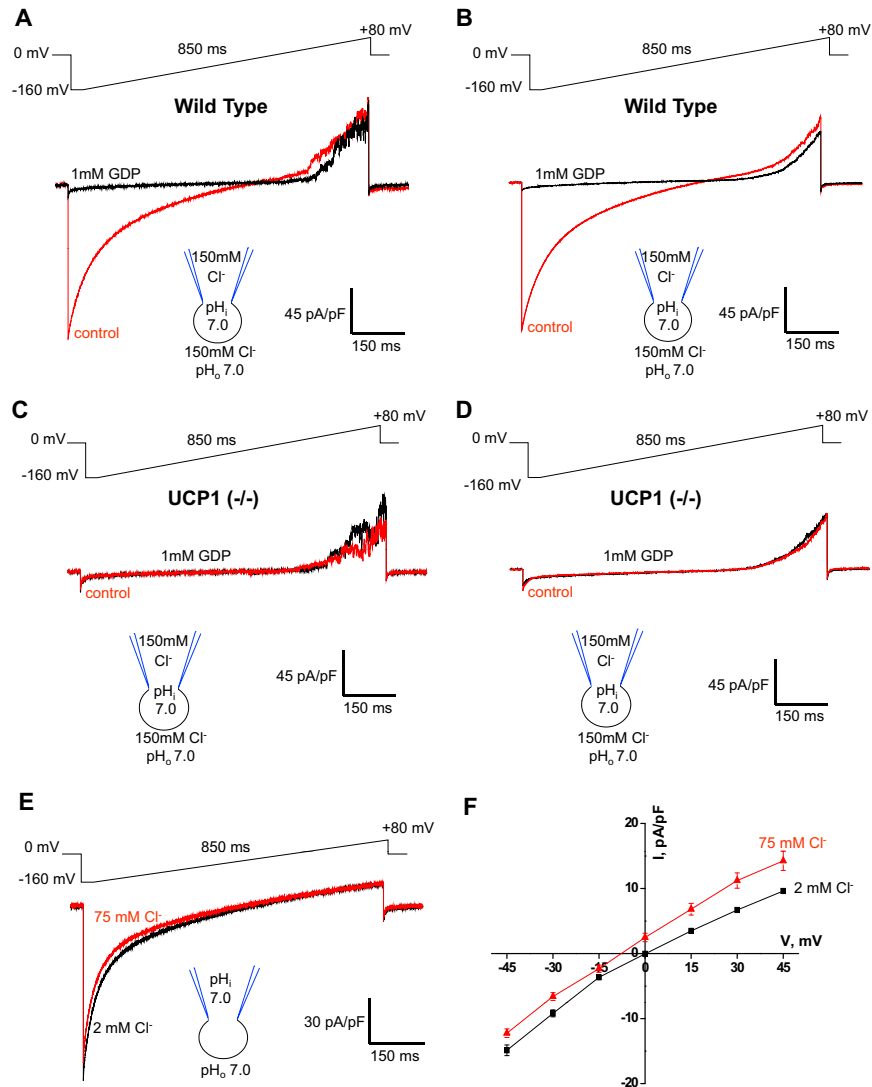

**Figure S7. Cl<sup>-</sup> Conductance of the IMM of BAT Is Primarily UCP1 Independent, Related to Figure 1**

(A) Representative whole-mitoplast currents recorded from a wild-type mitoplast in symmetrical 150 mM Cl<sup>-</sup> in control (red) and after the addition of 1 mM GDP (black).

(B) The same experiment as in (A), but each trace represents an average of 30–40 original current traces to smooth out fluctuations in the outward Cl<sup>-</sup> current mediated by the large-conductance 108 pS anion channel (IMAC).

(C) Representative whole-mitoplast currents recorded from a UCP1<sup>-/-</sup> mitoplast in symmetrical 150 mM Cl<sup>-</sup> in control (red) and after addition of 1 mM GDP (black).

(D) The same experiment as in (C), but each trace represents an average of 30–40 original current traces to smooth out fluctuations in the outward Cl<sup>-</sup> current mediated by the large-conductance 108 pS anion channel (IMAC).

(E) Representative whole-mitoplast  $I_{UCP1}$  in a bath solution containing 2 mM (black) or 75 mM (red) Cl<sup>-</sup>. Bath and pipette solutions contain 1 mM Mg<sup>2+</sup> to inhibit the IMAC current. Note the absence of large-conductance IMAC openings at positive potentials even in the presence of 75 mM Cl<sup>-</sup> in the bath (red trace).

(F) Current-voltage dependence of  $I_{UCP1}$  in a bath solution containing 2 mM (black) or 75 mM (red) Cl<sup>-</sup> (n = 5). The  $I_{UCP1}$  was recorded at symmetrical pH 7.0.  $I_{UCP1}$  was measured with a voltage step protocol from the holding potential of 0 mV (not shown). Current amplitudes were measured at the beginning of voltage steps. Error bars represent SEM.
